# Supplementary material for: Emodin potentiates the antiproliferative effect of interferon α/β by activation of JAK/STAT pathway signaling through inhibition of the 26S proteasome
Source: PubMed Central journal article supplement (PMC4826234; doi:10.18632/oncotarget.6616), 2015-12-14
Supplement: oncotarget-07-4664-s001.pdf [file oncotarget-07-4664-s001.pdf]

## MATERIALS AND METHODS

### Reagent

The Jak inhibitor ruxolitinib was purchased from Selleck (Shanghai, China).

### Plasmid construction and proteasome activity assay in vivo.

The pEGFP-CL1 plasmid was obtained by inserting the CL1 sequence (gcttgaagaactggttctctcttctcacttcgtatccactgtga) through EcoRI and BamHI endonuclease restriction sites to the pEGFP-C2 vector (CLONTECH, Palo Alto, CA). HeLa cells were seeded in 6-well plates and transiently transfected with 2.5  $\mu$ g pEGFP-CL1 plasmid using Lipofectamine™ 2000 Transfection Reagent (Invitrogen) in DMEM medium without antibiotics. After 4–6 h, the transfection medium (OPTI-MEM, Gibco-Invitrogen) was replaced with the normal medium (DMEM with 10% FBS). After 24 h of

transfection, cells were treated with MG132 or emodin for 6 h. The CL1 degradation was shown by GFP expression level. The images were obtained by fluorescence microscopy. The pEGFP-C2 plasmid lacking CL1 sequence was used as a positive control.

### Knockdown of STAT1 expression by siRNA transfection

The siRNA (5'-GGAUAAUUUCAGGAAGAC dTdT-3') to target human STAT1 and negative control siRNA (mock-siRNA) were synthesized by RiboBio Co., Ltd. (Guangzhou, China). Transient transfection of HeLa cells with siRNA (100 nm) was performed using Lipofectamine™ 2000 Transfection Reagent (Invitrogen) according to the manufacturer's protocol. For western blot experiments, cells were plated on 6-well dishes and cultured for 48 h after transfection to 100% confluence. For anti-proliferative studies, cells were plated on 24-well plates and transfected with siRNA for 48 h, followed by the treatment with emodin (10  $\mu$ M) and IFN- $\alpha$  (1  $\times$  10<sup>4</sup> U/mL) for another 72 h.

## SUPPLEMENTARY FIGURES

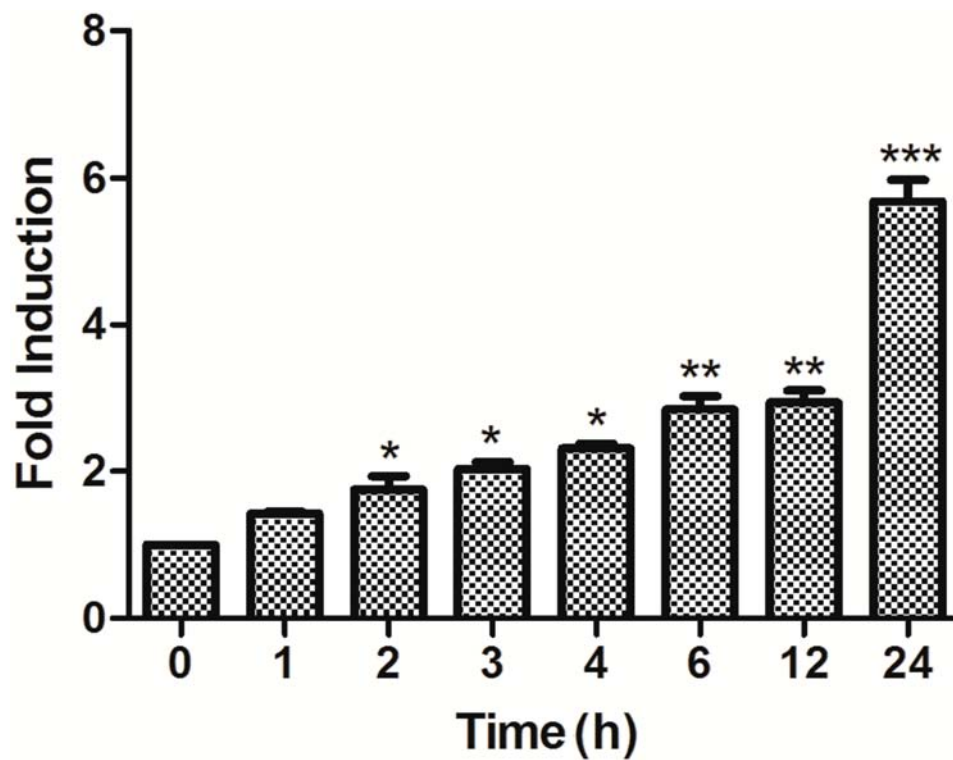

**Supplementary Figure S1: Effect of MG132 on luciferase-cODC expression.** HEK293A-luciferase-cODC cells were seeded into a 96-well plate and treated with MG132 (10 μM) for the indicated time. Cell lysates were measured for luciferase activity. (\*)  $p < 0.05$ , (\*\*)  $p < 0.01$ , (\*\*\*)  $p < 0.001$  compared to the DMSO control.

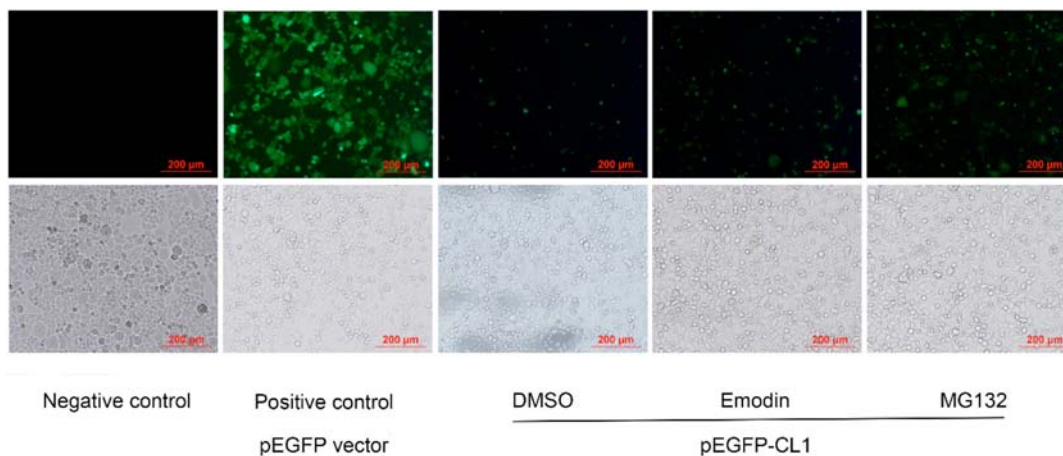

**Supplementary Figure S2: Emodin inhibits the activity of the 26S proteasome in vivo.** HeLa cells grown in 6-well plates were transiently transfected with GFP-CL1 or GFP for 24 h, followed by the treatment with MG132 (20 μM) or emodin (20 μM) for 6 h. The GFP expression level was observed by fluorescence microscopy.

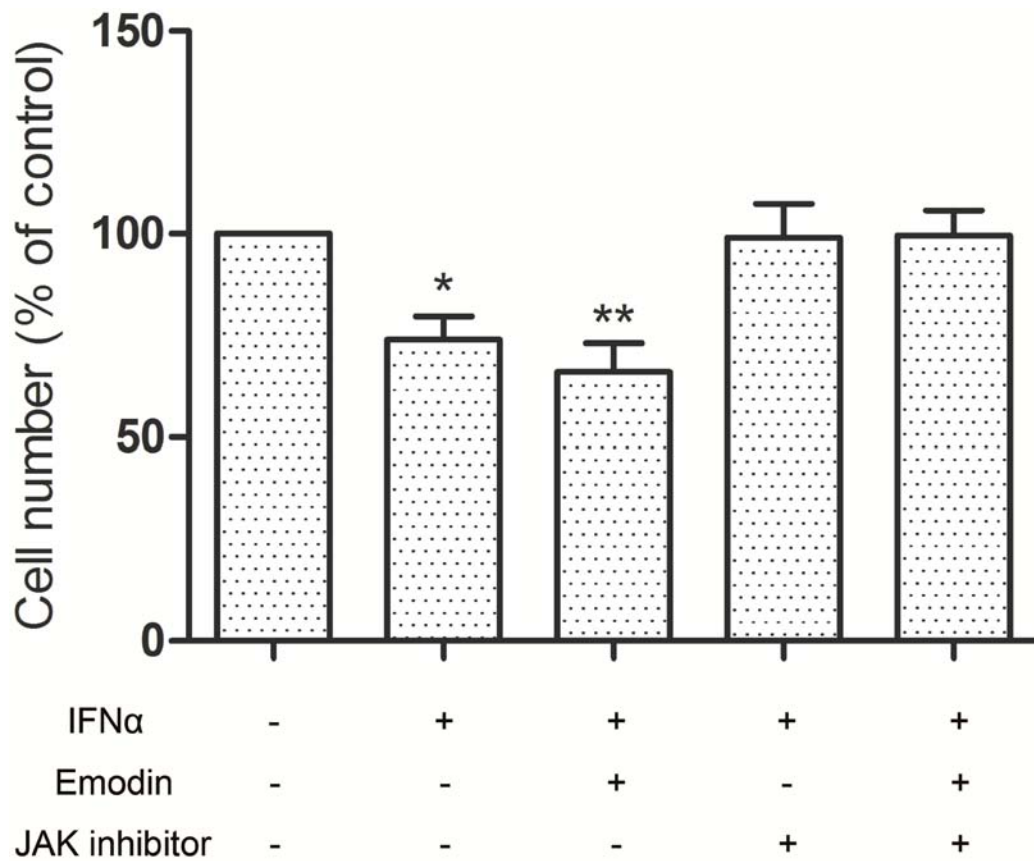

**Supplementary Figure S3: Effect of JAK inhibitor on the proliferation of cancer cells.** HeLa cells were seeded in 96-well plates and incubated with JAK inhibitor (Ruxolitinib, 1  $\mu$ M) for 1 h, followed by the addition of emodin (10  $\mu$ M) for 2 h and the treatment with IFN- $\alpha$  ( $1 \times 10^4$  U/mL) for 72 h. The numbers of cells were recorded by a counting board. (\*)  $p < 0.05$ , (\*\*)  $p < 0.01$ , (\*\*\*)  $p < 0.001$  vs. control ( $n = 3$ ).

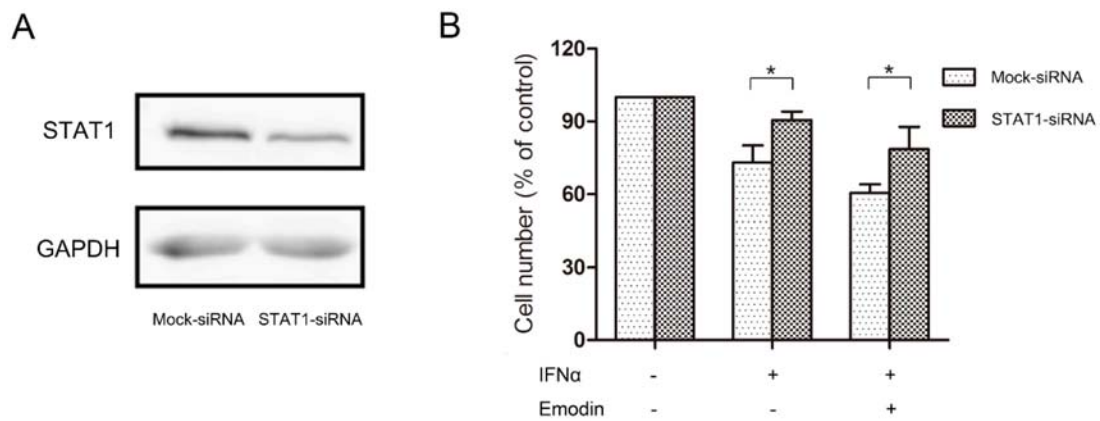

**Supplementary Figure S4: Effect of STAT1 knockdown on the proliferation of cancer cells.** **A.** HeLa cells cultured in 6-well plates were transfected with Mock-siRNA or STAT1-siRNA for 48 h. The cell lysates were immunoblotted with STAT1 antibody and GAPDH staining was shown as a loading control. **B.** HeLa cells were seeded in 24-well plates. After transfection with Mock-siRNA or STAT1-siRNA for 48 h, cells were incubated with 10  $\mu$ M emodin for 2 h and treated with IFN- $\alpha$  ( $1 \times 10^4$  U/mL) for another 72 h. The numbers of cells were recorded by a counting board. (\*)  $p < 0.05$ , (\*\*)  $p < 0.01$ , (\*\*\*)  $p < 0.001$  vs. Mock-siRNA control ( $n = 3$ ).
